# Supplementary material
Source: MDPI journal article supplement (https://www.mdpi.com/2308-3417/6/2/50)

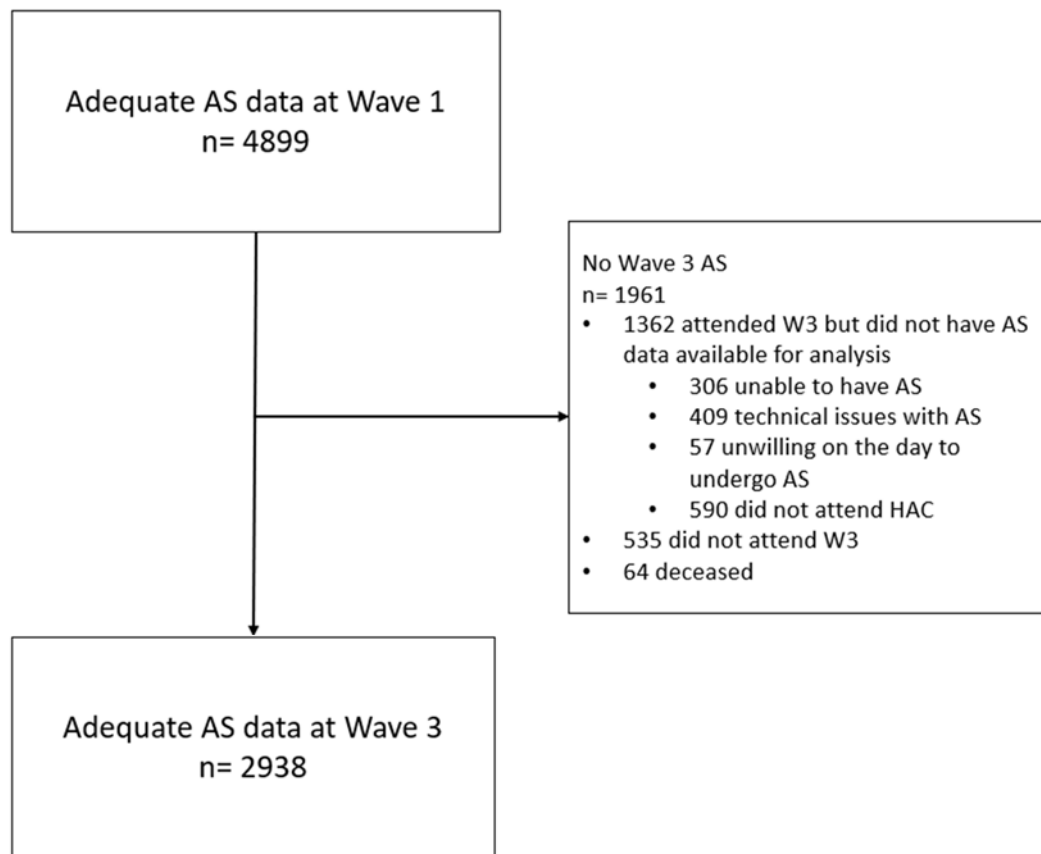

**Figure S1:** Sample for Analysis. AS; active stand, HAC: Health Assessment Centre

Supplement: s1 [file s1]
